# Supplementary material
Source: Springer Nature journal article supplement (https://www.springermedizin.de/resource/supplementary/13058_2012_2989_MOESM10_ESM.pdf/9703038)

**Control**

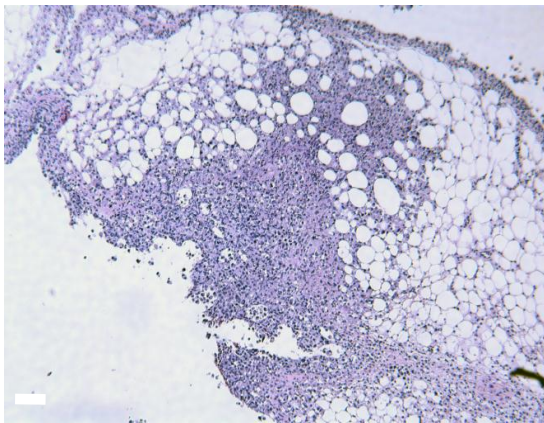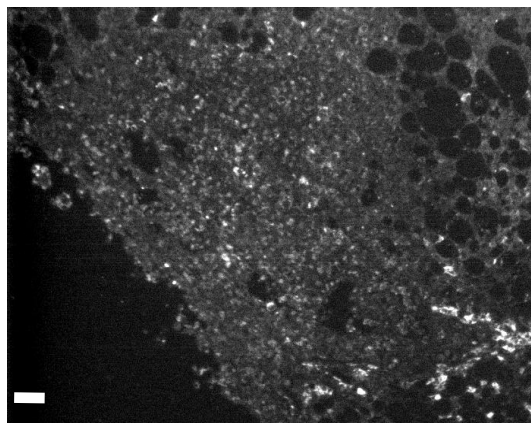

**LBH589**

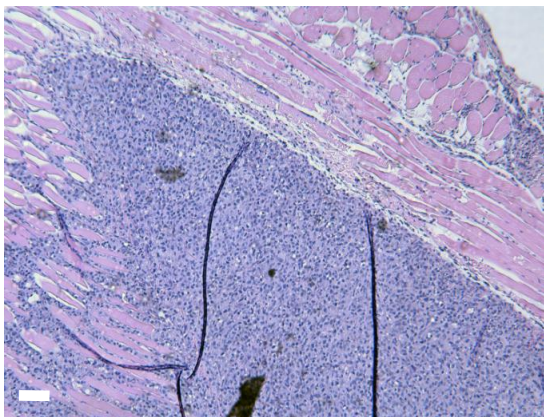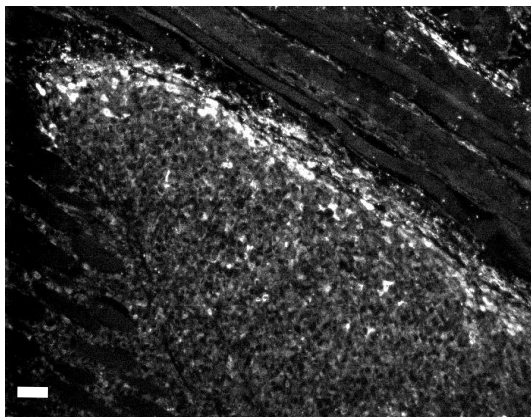

**H & E**

**CDH-1**

Supplement: MOESM10 [file 9703038]
